# Supplementary material for: DsbA-L mediated renal tubulointerstitial fibrosis in UUO mice
Source: PubMed Central journal article supplement (PMC7501299; doi:10.1038/s41467-020-18304-z), 2020-09-18
Supplement: 41467_2020_18304_MOESM3_ESM.pdf [file 41467_2020_18304_MOESM3_ESM.pdf]

**Title:** Supplementary Movie 1

**Description:** The movie dynamic showed the DsbA-L interacted with HSP90
