# Supplementary material for: DsbA-L mediated renal tubulointerstitial fibrosis in UUO mice
Source: PubMed Central journal article supplement (PMC7501299; doi:10.1038/s41467-020-18304-z), 2020-09-18
Supplement: 41467_2020_18304_MOESM5_ESM.pdf [file 41467_2020_18304_MOESM5_ESM.pdf]

## Reporting Summary

Nature Research wishes to improve the reproducibility of the work that we publish. This form provides structure for consistency and transparency in reporting. For further information on Nature Research policies, see our [Editorial Policies](#) and the [Editorial Policy Checklist](#).

### Statistics

For all statistical analyses, confirm that the following items are present in the figure legend, table legend, main text, or Methods section.

n/a Confirmed

- |                                     |                                     |                                                                                                                                                                                                                                                            |
|-------------------------------------|-------------------------------------|------------------------------------------------------------------------------------------------------------------------------------------------------------------------------------------------------------------------------------------------------------|
| <input type="checkbox"/>            | <input checked="" type="checkbox"/> | The exact sample size ( $n$ ) for each experimental group/condition, given as a discrete number and unit of measurement                                                                                                                                    |
| <input type="checkbox"/>            | <input checked="" type="checkbox"/> | A statement on whether measurements were taken from distinct samples or whether the same sample was measured repeatedly                                                                                                                                    |
| <input type="checkbox"/>            | <input checked="" type="checkbox"/> | The statistical test(s) used AND whether they are one- or two-sided<br><i>Only common tests should be described solely by name; describe more complex techniques in the Methods section.</i>                                                               |
| <input checked="" type="checkbox"/> | <input type="checkbox"/>            | A description of all covariates tested                                                                                                                                                                                                                     |
| <input type="checkbox"/>            | <input checked="" type="checkbox"/> | A description of any assumptions or corrections, such as tests of normality and adjustment for multiple comparisons                                                                                                                                        |
| <input type="checkbox"/>            | <input checked="" type="checkbox"/> | A full description of the statistical parameters including central tendency (e.g. means) or other basic estimates (e.g. regression coefficient) AND variation (e.g. standard deviation) or associated estimates of uncertainty (e.g. confidence intervals) |
| <input type="checkbox"/>            | <input checked="" type="checkbox"/> | For null hypothesis testing, the test statistic (e.g. $F$ , $t$ , $r$ ) with confidence intervals, effect sizes, degrees of freedom and $P$ value noted<br><i>Give <math>P</math> values as exact values whenever suitable.</i>                            |
| <input checked="" type="checkbox"/> | <input type="checkbox"/>            | For Bayesian analysis, information on the choice of priors and Markov chain Monte Carlo settings                                                                                                                                                           |
| <input checked="" type="checkbox"/> | <input type="checkbox"/>            | For hierarchical and complex designs, identification of the appropriate level for tests and full reporting of outcomes                                                                                                                                     |
| <input checked="" type="checkbox"/> | <input type="checkbox"/>            | Estimates of effect sizes (e.g. Cohen's $d$ , Pearson's $r$ ), indicating how they were calculated                                                                                                                                                         |

*Our web collection on [statistics for biologists](#) contains articles on many of the points above.*

### Software and code

Policy information about [availability of computer code](#)

Data collection

Data analysis

For manuscripts utilizing custom algorithms or software that are central to the research but not yet described in published literature, software must be made available to editors and reviewers. We strongly encourage code deposition in a community repository (e.g. GitHub). See the Nature Research [guidelines for submitting code & software](#) for further information.

### Data

Policy information about [availability of data](#)

All manuscripts must include a [data availability statement](#). This statement should provide the following information, where applicable:

- Accession codes, unique identifiers, or web links for publicly available datasets
- A list of figures that have associated raw data
- A description of any restrictions on data availability

All data in this study are true and reliable. The data that support the findings of this study are available from the corresponding author upon reasonable request. The source data underlying Figs(1–2,4-6 ) and Supplementary Figs. (3–9, 11-15, 17-19, 21-22, 24-25, 27-30) are provided as a Source Data file. Source data are provided with this paper. The remaining figures data is uploaded as supplementary information.

## Field-specific reporting

Please select the one below that is the best fit for your research. If you are not sure, read the appropriate sections before making your selection.

Life sciences  Behavioural & social sciences  Ecological, evolutionary & environmental sciences

For a reference copy of the document with all sections, see [nature.com/documents/nr-reporting-summary-flat.pdf](https://www.nature.com/documents/nr-reporting-summary-flat.pdf)

## Life sciences study design

All studies must disclose on these points even when the disclosure is negative.

|                 |                                                                                                                      |
|-----------------|----------------------------------------------------------------------------------------------------------------------|
| Sample size     | Sample size was based on experience from previous published experiments leading to significant results.              |
| Data exclusions | No data were excluded                                                                                                |
| Replication     | Most experiments were replicated at least three times. All replications confirmed the findings.                      |
| Randomization   | All animals are randomly selected for injection and modeling. All cell experiment groups are also randomly selected. |
| Blinding        | Blinding test was done for scoring of histology.                                                                     |

## Reporting for specific materials, systems and methods

We require information from authors about some types of materials, experimental systems and methods used in many studies. Here, indicate whether each material, system or method listed is relevant to your study. If you are not sure if a list item applies to your research, read the appropriate section before selecting a response.

### Materials & experimental systems

| n/a                                 | Involvement in the study                                        |
|-------------------------------------|-----------------------------------------------------------------|
| <input type="checkbox"/>            | <input checked="" type="checkbox"/> Antibodies                  |
| <input type="checkbox"/>            | <input checked="" type="checkbox"/> Eukaryotic cell lines       |
| <input checked="" type="checkbox"/> | <input type="checkbox"/> Palaeontology and archaeology          |
| <input type="checkbox"/>            | <input checked="" type="checkbox"/> Animals and other organisms |
| <input type="checkbox"/>            | <input checked="" type="checkbox"/> Human research participants |
| <input checked="" type="checkbox"/> | <input type="checkbox"/> Clinical data                          |
| <input checked="" type="checkbox"/> | <input type="checkbox"/> Dual use research of concern           |

### Methods

| n/a                                 | Involvement in the study                        |
|-------------------------------------|-------------------------------------------------|
| <input checked="" type="checkbox"/> | <input type="checkbox"/> ChIP-seq               |
| <input checked="" type="checkbox"/> | <input type="checkbox"/> Flow cytometry         |
| <input checked="" type="checkbox"/> | <input type="checkbox"/> MRI-based neuroimaging |

## Antibodies

|                 |                                                                                                                                                                                                                                                                                                                                                                                                                                                                                                                                                                                                                                                                                                                                         |
|-----------------|-----------------------------------------------------------------------------------------------------------------------------------------------------------------------------------------------------------------------------------------------------------------------------------------------------------------------------------------------------------------------------------------------------------------------------------------------------------------------------------------------------------------------------------------------------------------------------------------------------------------------------------------------------------------------------------------------------------------------------------------|
| Antibodies used | Anti-GAPDH ab181602, WB1:1000 , anti-HSP90 ab13492 ,WB1:1000 ,IF1:500, IP1:500 , anti-β-actin ab8227WB1:1000 , anti-collagen # ab34710, WB1:1000, IHC:100 , anti-collagen III(ab7778WB1:1000, IHC1:100), anti-vimentin(ab92547), anti-α-SMA (ab32575) and anti-CTGF (ab6992) antibodies were obtained from Abcam (Cambridge Science Park, Cambridge, UK), Anti-p53(cst#2524), p-Smad3(#9520) ,Smad3 ( #9523) and HA #3724 were purchased from Cell Signaling Technology (Danvers, MA, USA), while Anti-COXIV(11242-1-AP, 60251-1-Ig 1:50 for IF) and Beta Tubulin (10068-1-AP) were obtained from Proteintech (Rosemont, IL, USA). DsbA-L (WB 1:2000, IF1:500, IP1:500, IHC1:50) Anti-DsbA-L antibody was provided by Dr. Feng Liu Lab. |
| Validation      | All antibodies have been verified by the official website. Anti-DsbA-L antibody has been verified in previous experiments.                                                                                                                                                                                                                                                                                                                                                                                                                                                                                                                                                                                                              |

## Eukaryotic cell lines

Policy information about [cell lines](#)

|                                                                   |                                                                                                                                              |
|-------------------------------------------------------------------|----------------------------------------------------------------------------------------------------------------------------------------------|
| Cell line source(s)                                               | The mouse renal proximal tubular epithelial cell line BUMPT was obtained from Dr. Wilfred Lieberthal (Boston University School of Medicine). |
| Authentication                                                    | BUMPT cell lines have been unauthenticated.                                                                                                  |
| Mycoplasma contamination                                          | Cell lines were not tested for mycoplasma contamination but no indication of contamination was observed                                      |
| Commonly misidentified lines (See <a href="#">ICLAC</a> register) | No commonly misidentified cell lines were used                                                                                               |

## Animals and other organisms

Policy information about [studies involving animals](#); [ARRIVE guidelines](#) recommended for reporting animal research

|                         |                                                                                                                                                                                          |
|-------------------------|------------------------------------------------------------------------------------------------------------------------------------------------------------------------------------------|
| Laboratory animals      | The proximal tubule-specific DabA-L-deletion mice were generated by crossing DsbA-L (flox/flox) mice (provided by Dr. Feng Liu Lab) with PEPCK-Cre mice (provided by Jackson Laboratory) |
| Wild animals            | The study did not involve wild animals.                                                                                                                                                  |
| Field-collected samples | The study did not involve samples collected from the field                                                                                                                               |
| Ethics oversight        | This animal experiment was approved by the Animal Ethics Committee of the Second Xiangya Hospital of Central South University.                                                           |

Note that full information on the approval of the study protocol must also be provided in the manuscript.

## Human research participants

Policy information about [studies involving human research participants](#)

|                            |                                                                                                                                                                                                                                                                                                                                                                                                   |
|----------------------------|---------------------------------------------------------------------------------------------------------------------------------------------------------------------------------------------------------------------------------------------------------------------------------------------------------------------------------------------------------------------------------------------------|
| Population characteristics | There is not a lot of demographic analysis, so it does not have characteristics, and all the samples are from the tissues removed by clinical surgery patients.                                                                                                                                                                                                                                   |
| Recruitment                | All organizations obtained the patient's consent and patients provided informed consent. Among them, Mcd tissue was collected from patients diagnosed with minimal change disease, and OB tissue is obstructive nephropathy tissue.                                                                                                                                                               |
| Ethics oversight           | This experiment was approved by the Medical Ethics Committee of the Second Xiangya Hospital of Central South University. approval number is Lnc 2018-1. All organizations obtained the patient's consent. We declare all study complies with all relevant ethical regulations for research with human participants and was carried out in compliance with the Declaration of Helsinki principles. |

Note that full information on the approval of the study protocol must also be provided in the manuscript.

## Clinical data

Policy information about [clinical studies](#)

All manuscripts should comply with the ICMJE [guidelines for publication of clinical research](#) and a completed [CONSORT checklist](#) must be included with all submissions.

|                             |                                                           |
|-----------------------------|-----------------------------------------------------------|
| Clinical trial registration | This study did not conduct clinical research experiments. |
| Study protocol              | This study did not conduct clinical research experiments. |
| Data collection             | This study did not conduct clinical research experiments. |
| Outcomes                    | This study did not conduct clinical research experiments. |
